# Supplementary material for: The development of active binocular vision under normal and alternate rearing conditions
Source: eLife journal article supplement (doi:10.7554/elife.56212), 2021-08-17

**normal**

coarse scale

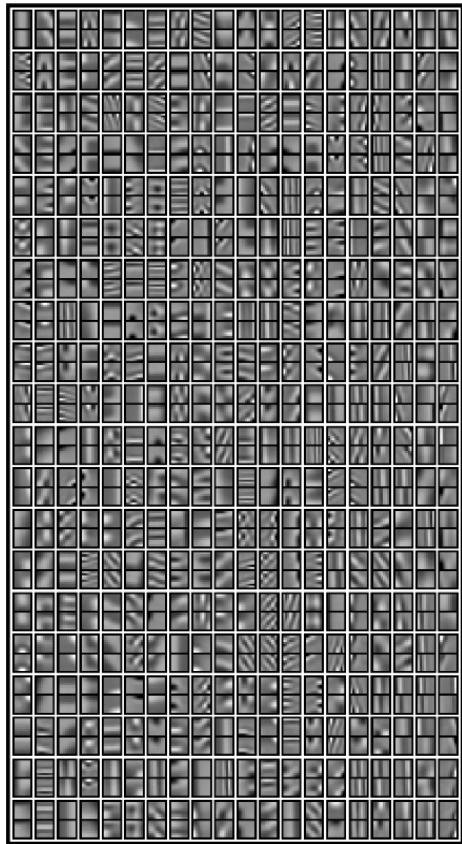

fine scale

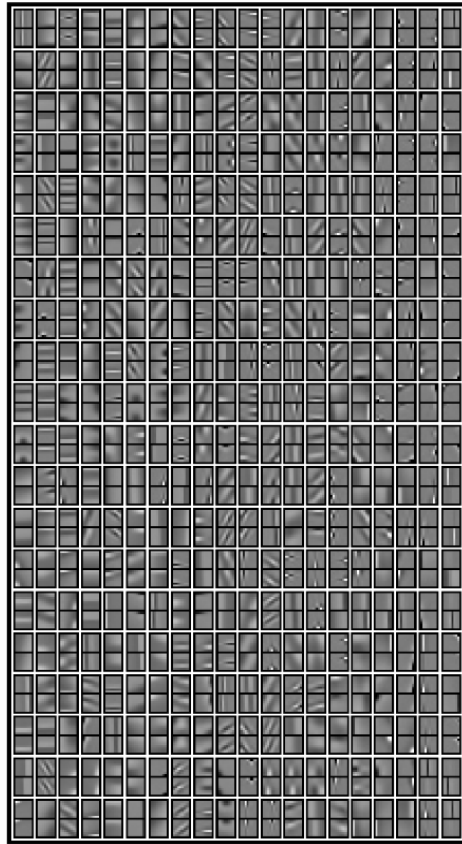

**vertical**

coarse scale

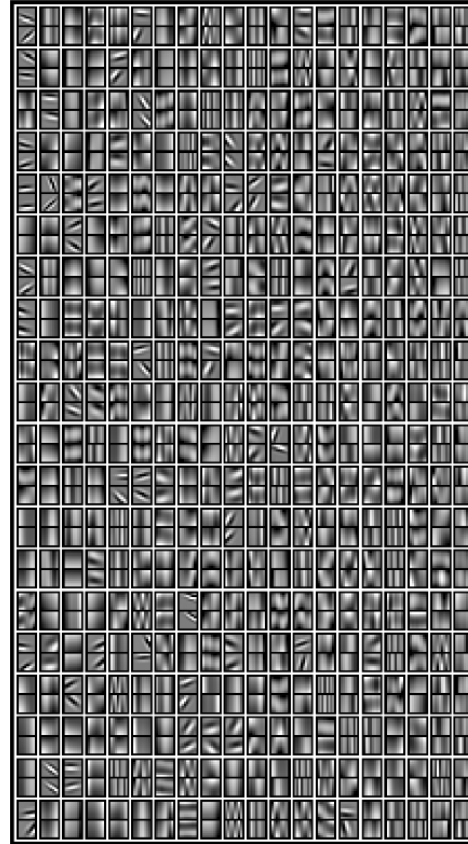

fine scale

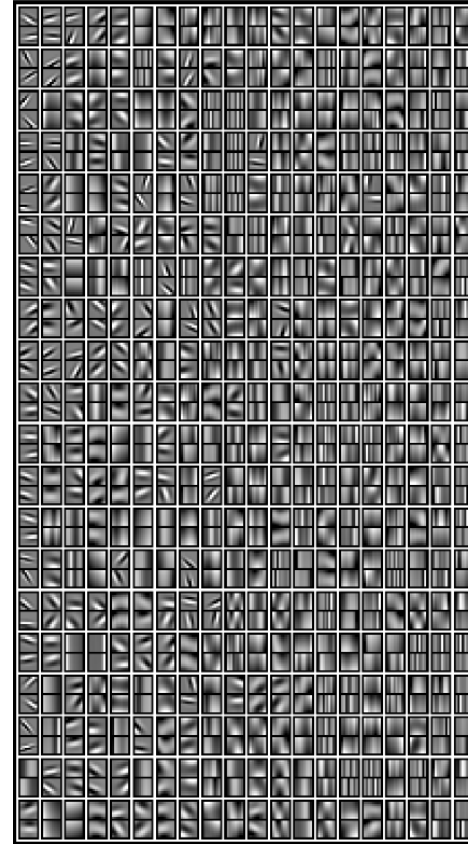

**horizontal**

coarse scale

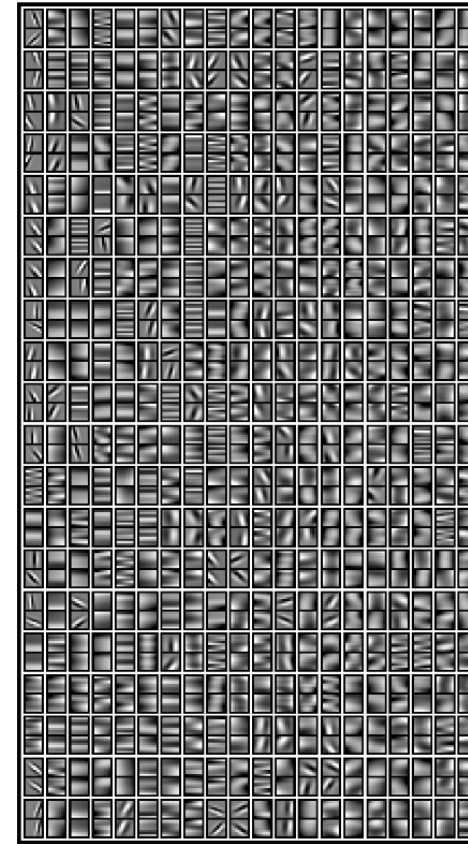

fine scale

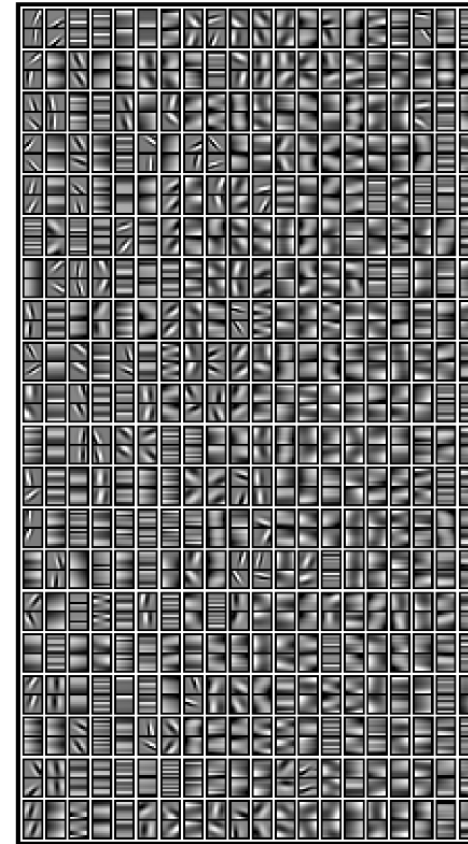

**orthogonal**

coarse scale

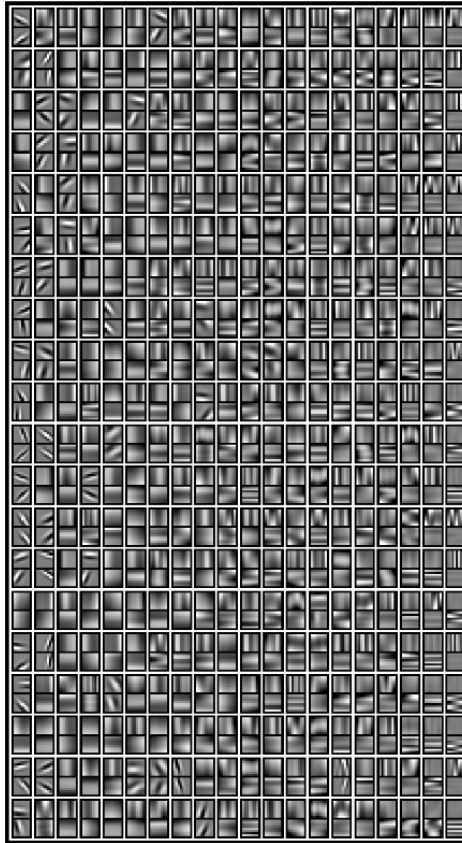

fine scale

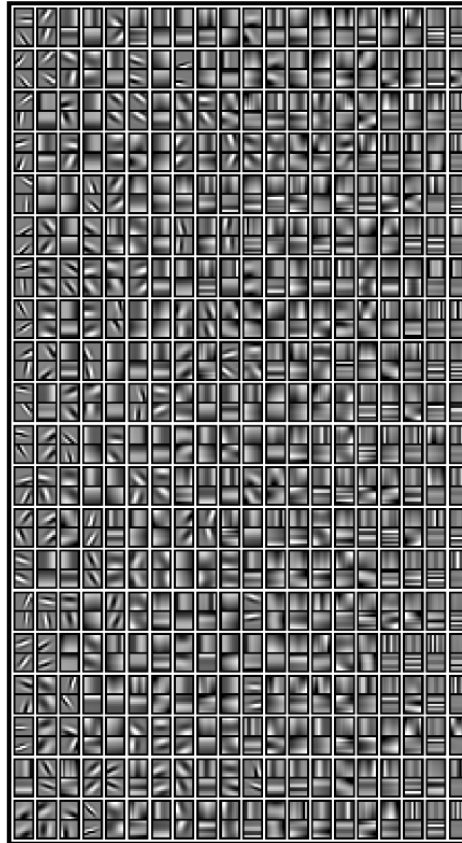

**monocular**

coarse scale

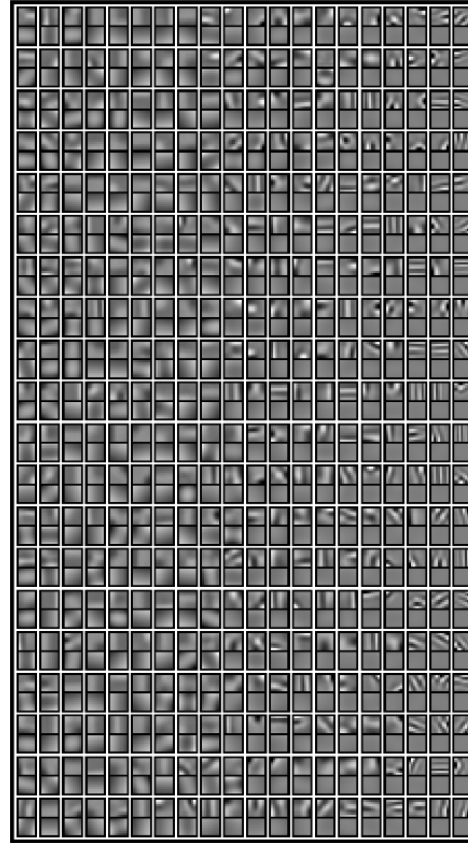

fine scale

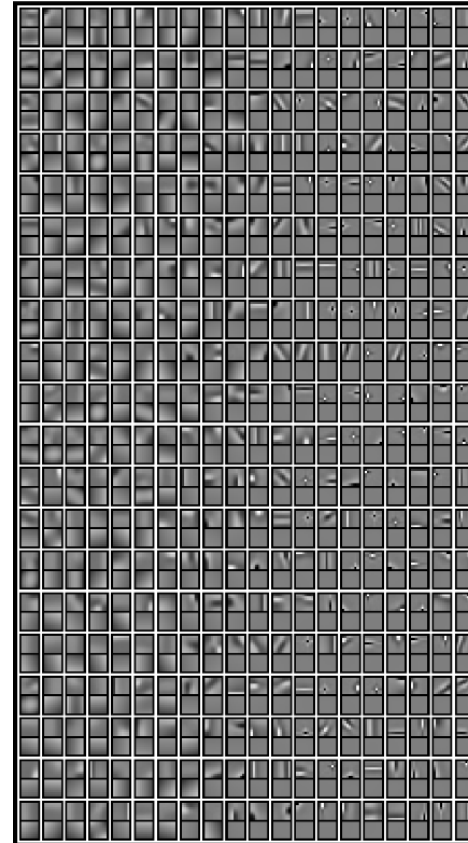

**strabismic**

coarse scale

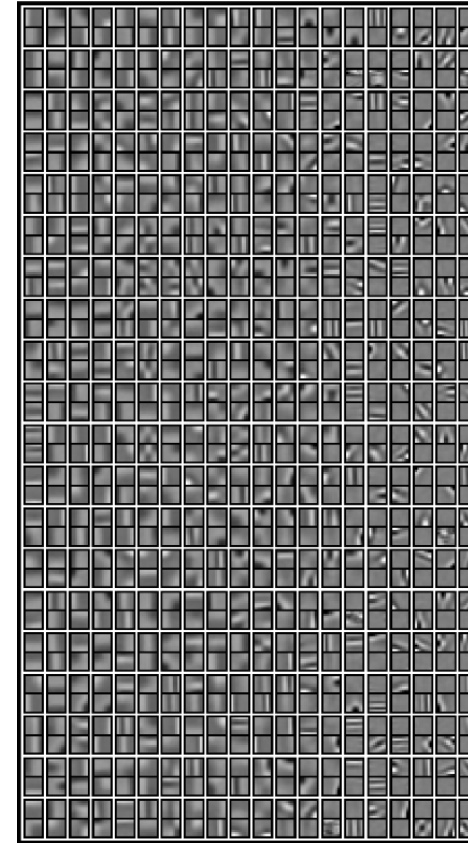

fine scale

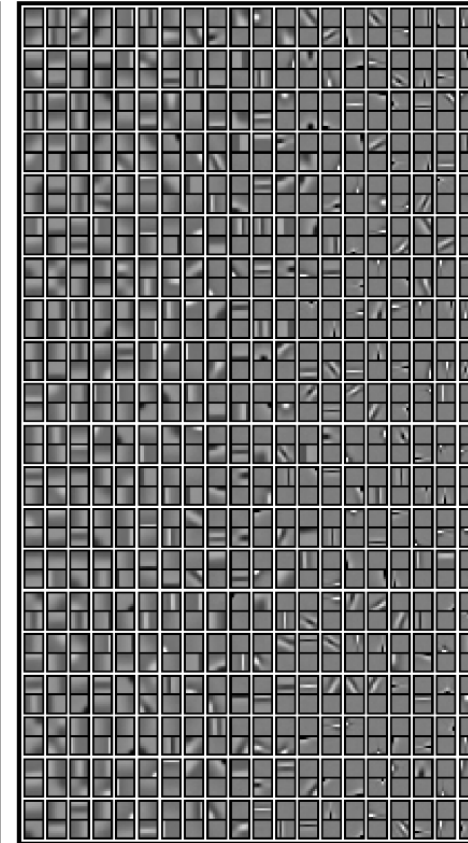

Supplement: supp [file elife_poa_e56212_Figure_2_figure_supplement_1.pdf › elife_poa_e56212_Figure_2_figure_supplement_1.pdf]
