# Supplementary material for: The development of active binocular vision under normal and alternate rearing conditions
Source: eLife journal article supplement (doi:10.7554/elife.56212), 2021-08-17

0%

coarse scale

fine scale

10%

coarse scale

fine scale

15%

coarse scale

fine scale

25%

coarse scale

fine scale

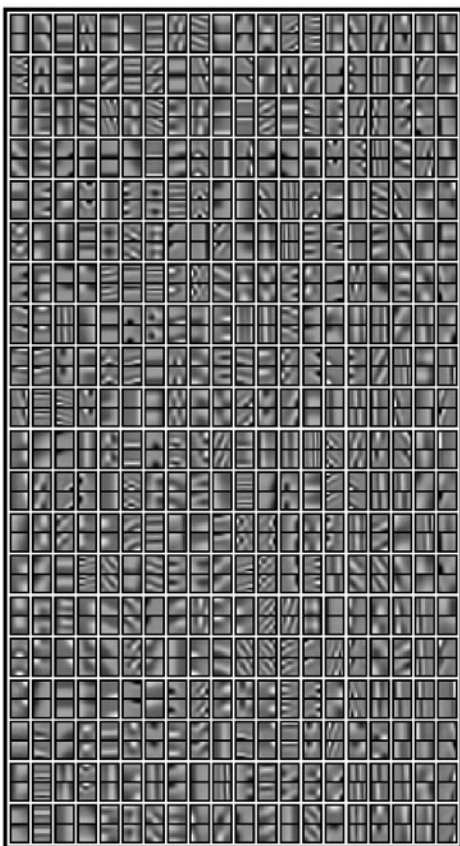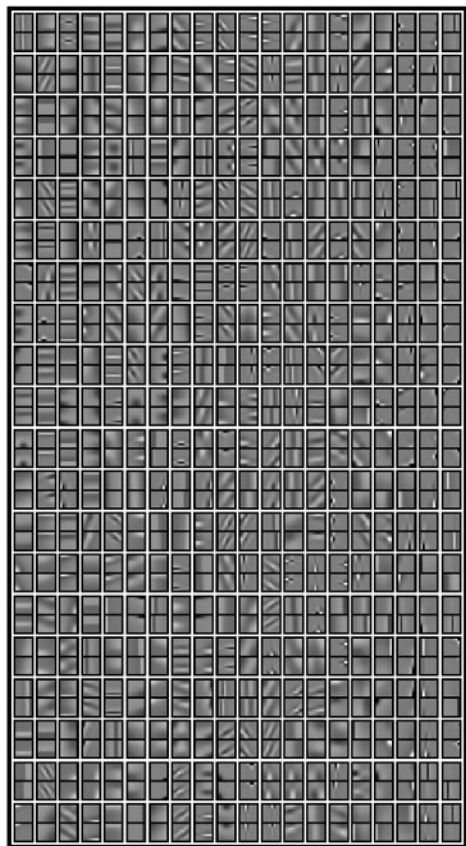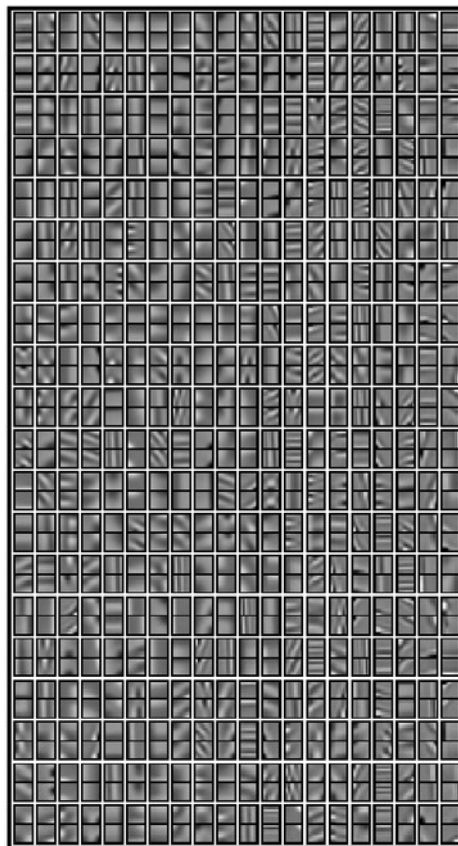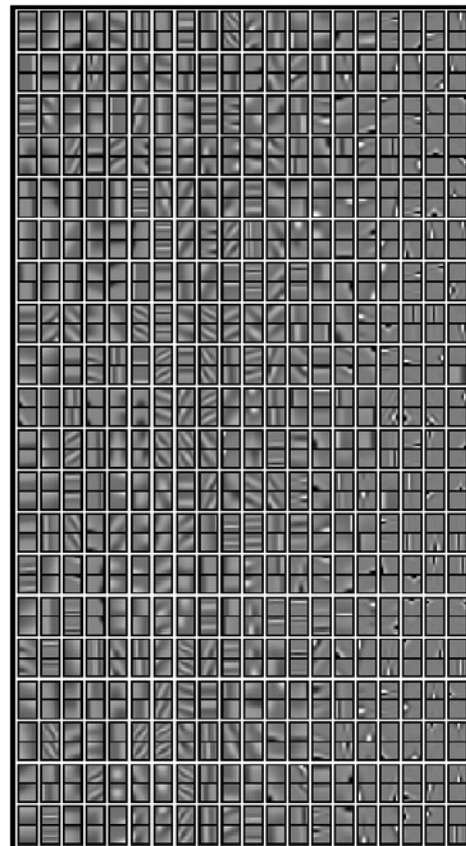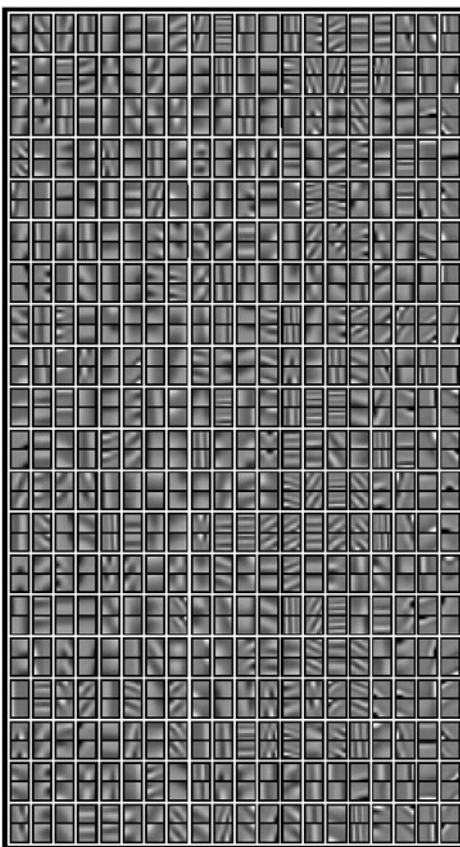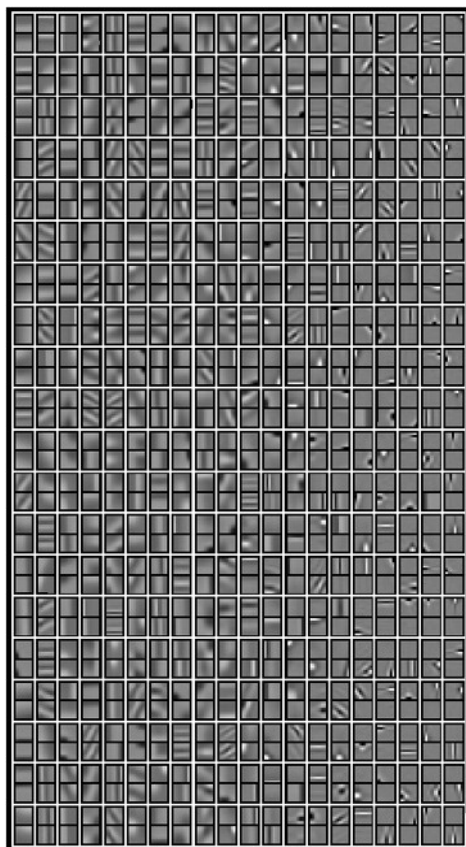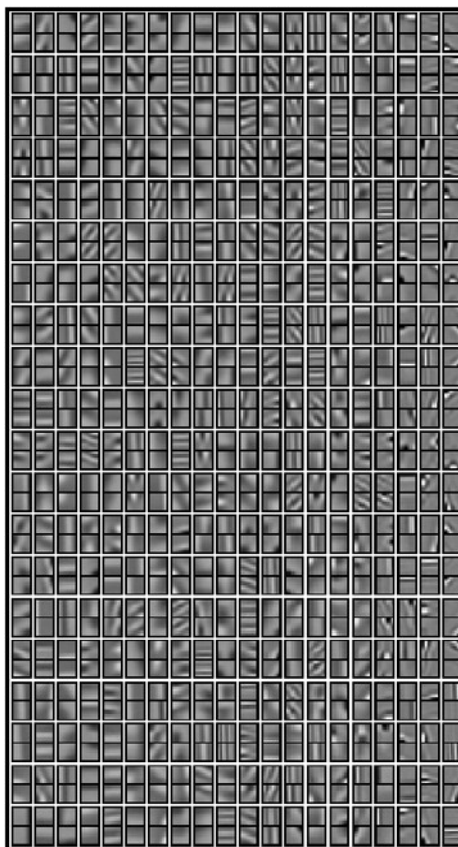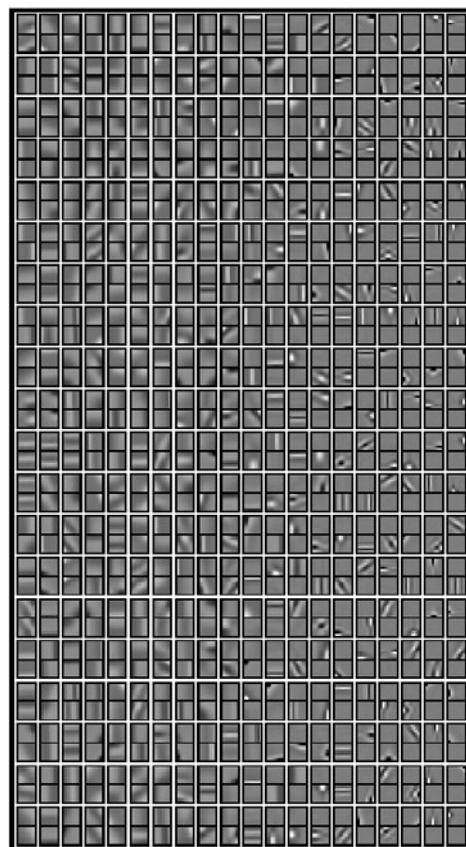

Supplement: supp [file elife_poa_e56212_Figure_8_figure_supplement_2.pdf › elife_poa_e56212_Figure_8_figure_supplement_2.pdf]
