# Supplementary figures and images for: The development of active binocular vision under normal and alternate rearing conditions
Source: eLife journal article supplement (doi:10.7554/elife.56212), 2021-08-17

# strabismic (3 deg)

$\bar{N}=33$

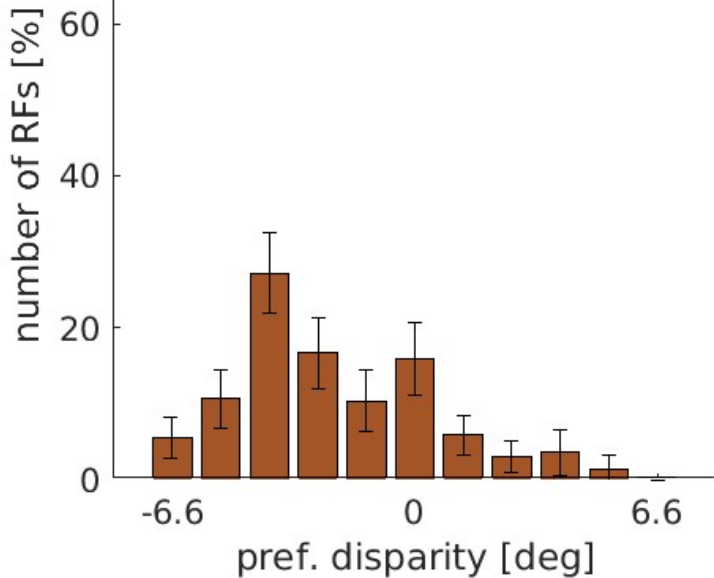

Supplement: supp [file elife_poa_e56212_Figure_1_figure_supplement_2.pdf › elife_poa_e56212_Figure_1_figure_supplement_2.pdf]

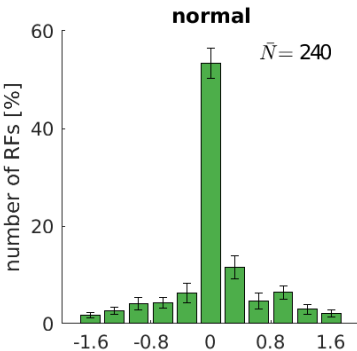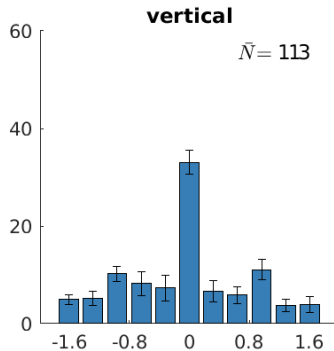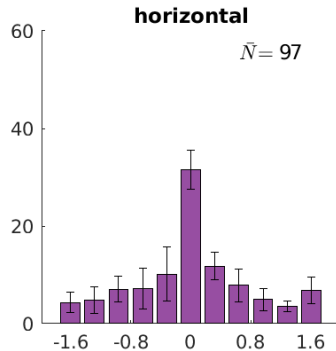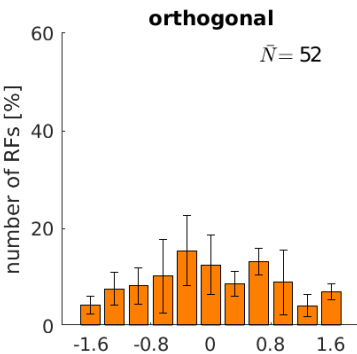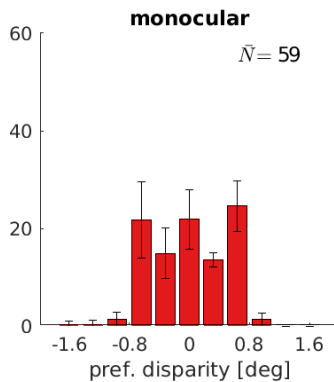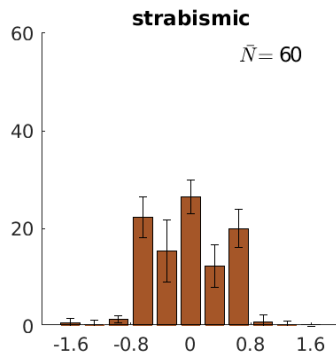

Supplement: supp [file elife_poa_e56212_Figure_5_figure_supplement_1.pdf › elife_poa_e56212_Figure_5_figure_supplement_1.pdf]

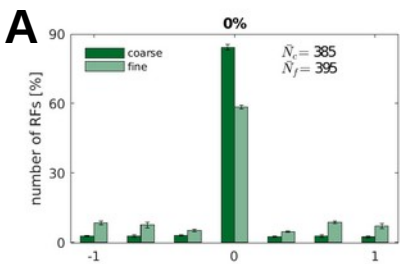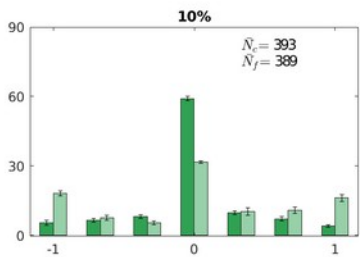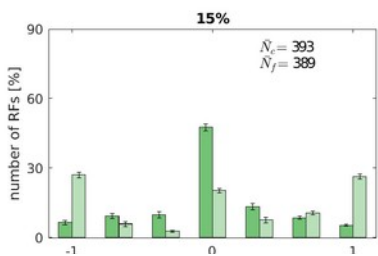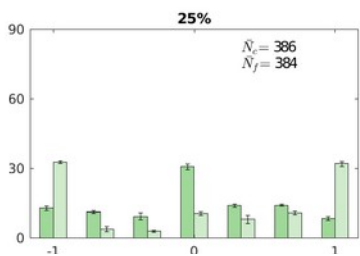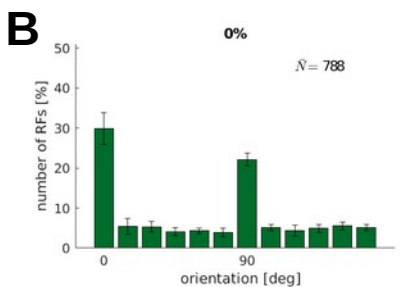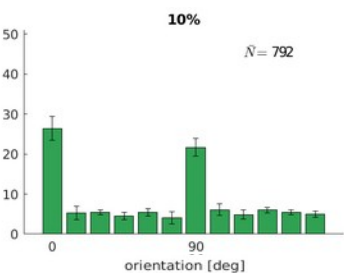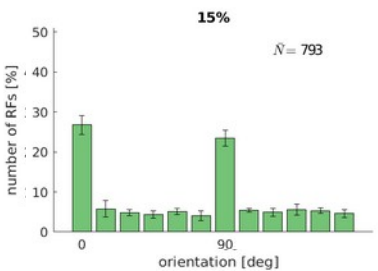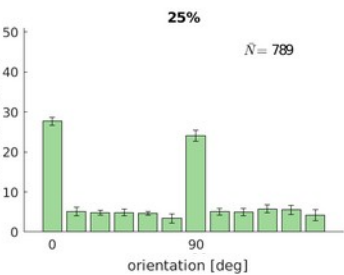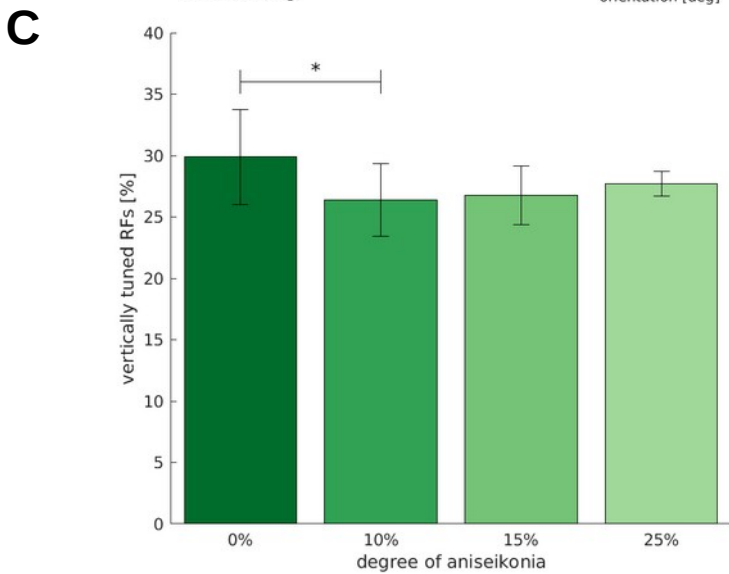

Supplement: supp [file elife_poa_e56212_Figure_8_figure_supplement_t_1.pdf › elife_poa_e56212_Figure_8_figure_supplement_t_1.pdf]

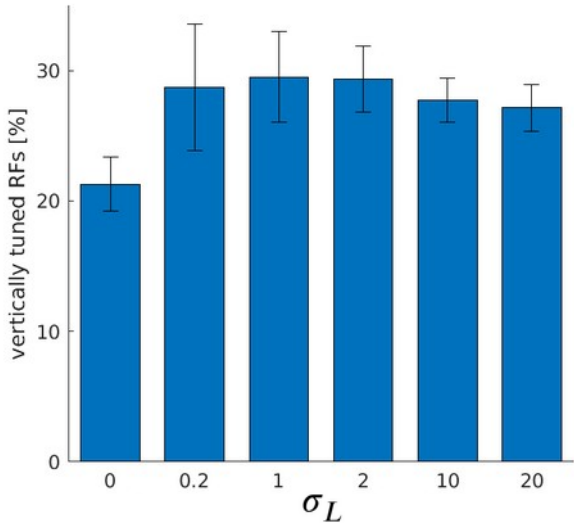

Supplement: supp [file elife_poa_e56212_Figure_9_figure_supplement_1.pdf › elife_poa_e56212_Figure_9_figure_supplement_1.pdf]
